# Supplementary material for: Pathogenicity of a novel bovine adenovirus type 3 with a natural deletion partial fiber gene in BALB/c mice
Source: Front Vet Sci. 2023 Mar 23;10:1138159. doi: 10.3389/fvets.2023.1138159 (PMC10076824; doi:10.3389/fvets.2023.1138159)
Supplement: Supplementary file 1 [file Table_1.DOC]

| **DPIb** | **Tests** | **Heart** | **Liver** | **Spleen** | **Lung** | **Kidney** | **Trachea** | **Blood** |
| --- | --- | --- | --- | --- | --- | --- | --- | --- |
| **1** | **TCID50**  **qPCR** | **3(10,102,102)** | **3(102,103,103)** | **3(102,102,102)** | **3(102.5,102.5,102.33)**c | **3(102.33,102.5,102.5)** | **1(103.33)** | **3(103.33,103,103.5)** |
| **3(2.55×103,1.26×103, 8.30×102)** | **3(1.20×102,1.64×103, 8.60×102)** | **3(4.85×103,3.90×102, 4.70×102)** | **3(8.80×103,5.94×103,2.13×104)**d | **3(8.80×102,1.08×103,1.51×103)** | **1(5.20×104)** | **3(1.15×104,9.15×103,1.55×104)** |
| **3** | **TCID50**  **qPCR** | **3(102.5,102.5,102.5)** | **3(103.5,103.5,103.5)** | **3(102,102.5,102.5)** | **3(103.67,104.67,104.67)** | **3(102.5,102.5,102.5)** | **1(102.5)** | **3(103.33,103.33,103)** |
| **3(8.20×102,2.02×103,8.90×103)** | **3(2.69×103,1.036×104,8.19×103)** | **3(7.95×103,6.29×103,7.43×103)** | **3(1.45×105,8.12×104,7.79×104)** | **3(2.36×103,2.33×103,2.28×103)** | **1(2.64×104)** | **3(1.41×104,3.75×103,3.55×103)** |
| **5** | **TCID50**  **qPCR** | **3(103,102.5,103.33)** | **3(104.5,104.33,104.5)** | **3(102.5,102.67,102.67)** | **3(103,104.5,104.5)** | **3(103.33,103.5103.5)** | **1(103)** | **3(103.33,103 103)** |
| **3(4.93×104,5.66×105,7.46×104)** | **3(2.96×103,4.06×104,2.66×104)** | **3(3.11×104,7.26×104,7.60×104)** | **3(5.73×104,2.77×104,1.01×104)** | **3(5.19×104,1.69×105,1.60×105)** | **1(3.55×104)** | **3(2.98×104,1.18×104,7.29×103)** |
| **7** | **TCID50**  **qPCR** | **3(102.67,102.67,102.5)** | **3(103.5,103,103)** | **3(102.33,102.33,102.5)** | **3(102.5,102.33,102.33)** | **3(103.33,103.33,103.5)** | **1(102.33)** | **3(103,103.33,103.33)** |
| **3(1.12×103,1.09×103,7.08×103)** | **3(1.45×103,1.27×103,6.36×103)** | **3(1.07×103,7.21×103,3.37×103)** | **3(5.38×103, 6.74×103, 8.27×103)** | **3(6.90×103,6.51×103,5.36×103)** | **1(5.65×103)** | **3(1.18×103,1.98×104,1.55×104)** |
| **9** | **TCID50**  **qPCR** | **3(102.33,102.33,102.5)** | **3(103,103,103)** | **3(102.67,102.5,102.5)** | **3(102.5,102.5,102.5)** | **3(103.33,103.5,103.5)** | **1(102.66)** | **3(103.33,103.5,103.33)** |
| **3(1.04×103,7.52×103,1.04×103)** | **3(1.16×103,1.24×103,1.34×103)** | **3(6.61×103,1.32×104,6.29×103)** | **3(9.63×103,4.03×103, 8.18×103)** | **3(7.60×102,3.79×103,3.04×103)** | **1(3.62×104)** | **3(2.44×104,7.85×103,1.61×104)** |
| **11** | **TCID50**  **qPCR** | **3(102.5,102.5,102.5)** | **3(103.5,103.5,103.33)** | **3(102.5,102.5,102.67)** | **3(102,102.5,102.5)** | **3(103.5,103.5,103.5)** | **1(103.33)** | **3(103.33,103,103.33)** |
| **3(1.64×103,3.43×103,1.83×103)** | **3(2.24×103,2.06×103,1.39×103)** | **3(4.04×103, 1.69×103,4.32×103)** | **3(2.23×103, 3.88×103, 3.70×103)** | **3(3.14×103,1.93×103,1.29×103)** | **1(5.75×104)** | **3(1.28×104,1.32×104,2.38×104)** |
| **13** | **TCID50**  **qPCR** | **3(102,102,101.33)** | **3(102.67,103,103.33)** | **3(102.5,102.5,102.5)** | **3(102.67,102.5,102.5)** | **3(103,103,103)** | **1(104)** | **3(103.67,103.5,103.5)** |
| **3(3.29×103,1.10×103,1.66×103)** | **3(1.22×103,9.80×102,7.30×102)** | **3(6.51×103,4.84×103,1.11×103)** | **3(1.16×104,4.99×103,4.51×103)** | **3(2.64×103,2.47×103,1.27×103)** | **1(9.82×104)** | **3(4.26×104,3.10×104,2.27×104)** |
| **15** | **TCID50**  **qPCR** | **3(10,10,10)** | **3(102,102,102.5)** | **3(101.33,10,10)** | **3(102.67,102.5,103)** | **3(102.5,102.33,102.33)** | **1(104.33)** | **3(103.5,103.33,103)** |
| **3(1.46×103,1.33×103,4.03×103)** | **3(1.25×103,7.60×102,8.80×102)** | **3(6.60×102,1.90×102,3.60×102)** | **3(4.56×103,6.63×103,1.21×104)** | **3(3.41×103,1.73×103,1.73×103)** | **1(1.17×105)** | **3(2.94×104,1.84×104,2.92×104)** |

**Table S1.** **Results of viral titers (TCID50) and viral loads of tissue homogenates of micea**

a Three animals were tested for two tests. Iso: virus isolation; qPCR: Real-time PCR. b Days post inoculation when euthanized.

c Positive number and TCID50 of tissue homogenates per ml. d Positive number and viral load of tissue homogenates per gram.
